# Supplementary material for: Genetic diversity, breed composition and admixture of Kenyan domestic pigs
Source: PLoS One. 2018 Jan 22;13(1):e0190080. doi: 10.1371/journal.pone.0190080 (PMC5777648; doi:10.1371/journal.pone.0190080)
Supplement: S1 Appendix — (XLSX) [file pone.0190080.s001.xlsx]

## Sheet: Genes for all populations
Population	Gene start (bp)	Gene end (bp)	Chromosome	Gene name	Gene description
Homabay	121629033	121913168	1	ATP8B4	ATPase phospholipid transporting 8B4 (putative) [Source:HGNC Symbol;Acc:HGNC:13536]
Homabay	265322049	265570921	1	NR6A1	nuclear receptor subfamily 6 group A member 1 [Source:RefSeq peptide;Acc:NP_001090968]
Homabay	15867840	15949956	1	PPP1R14C	protein phosphatase 1 regulatory inhibitor subunit 14C [Source:HGNC Symbol;Acc:HGNC:14952]
Homabay	265497249	265497328	1	ssc-mir-181a-2	ssc-mir-181a-2 [Source:miRBase;Acc:MI0013106]
Homabay	265499108	265499196	1	ssc-mir-181b-2	ssc-mir-181b-2 [Source:miRBase;Acc:MI0002420]
Homabay	28376901	28377003	2	U6	U6 spliceosomal RNA [Source:RFAM;Acc:RF00026]
Homabay	28411450	28456019	2	WT1	Wilms tumor protein homolog [Source:RefSeq peptide;Acc:NP_001001264]
Homabay	28411484	28411592	2	WT1-AS_1	WT1 antisense RNA conserved region 1 [Source:RFAM;Acc:RF02203]
Homabay	28410345	28410582	2	WT1-AS_3	WT1 antisense RNA conserved region 3 [Source:RFAM;Acc:RF02205]
Homabay	28410164	28410296	2	WT1-AS_4	WT1 antisense RNA conserved region 4 [Source:RFAM;Acc:RF02206]
Homabay	28408146	28408266	2	WT1-AS_6	WT1 antisense RNA conserved region 6 [Source:RFAM;Acc:RF02208]
Homabay	28407372	28407665	2	WT1-AS_7	WT1 antisense RNA conserved region 7 [Source:RFAM;Acc:RF02209]
Homabay	28407003	28407282	2	WT1-AS_8	WT1 antisense RNA conserved region 8 [Source:RFAM;Acc:RF02210]
Homabay	54863623	54930849	3	EIF5B	eukaryotic translation initiation factor 5B [Source:HGNC Symbol;Acc:HGNC:30793]
Homabay	54135540	54863106	3	REV1	REV1, DNA directed polymerase [Source:HGNC Symbol;Acc:HGNC:14060]
Homabay	122837525	122953257	4	ABCD3	ATP-binding cassette sub-family D member 3 [Source:RefSeq peptide;Acc:NP_001231062]
Homabay	122826644	122840508	4	F3	tissue factor [Source:RefSeq peptide;Acc:NP_998950]
Homabay	12455656	12459769	4	MYC	myc proto-oncogene protein [Source:RefSeq peptide;Acc:NP_001005154]
Homabay	12408842	12409037	4	PVT1_1	Pvt1 oncogene conserved region 1 [Source:RFAM;Acc:RF02164]
Homabay	18642823	18648848	5	AMHR2	Sus scrofa anti-Mullerian hormone receptor type 2 (AMHR2), mRNA. [Source:RefSeq mRNA;Acc:NM_001205327]
Homabay	18696607	18717199	5	MAP3K12	mitogen-activated protein kinase kinase kinase 12 [Source:HGNC Symbol;Acc:HGNC:6851]
Homabay	18724164	18724826	5	NPFF	neuropeptide FF-amide peptide precursor [Source:HGNC Symbol;Acc:HGNC:7901]
Homabay	77781714	77795179	5	PCED1B	PC-esterase domain containing 1B [Source:HGNC Symbol;Acc:HGNC:28255]
Homabay	18588941	18630760	5	SP1	Sp1 transcription factor [Source:HGNC Symbol;Acc:HGNC:11205]
Homabay	18718158	18723839	5	TARBP2	TARBP2, RISC loading complex RNA binding subunit [Source:HGNC Symbol;Acc:HGNC:11569]
Homabay	18678623	18678725	5	U6	U6 spliceosomal RNA [Source:RFAM;Acc:RF00026]
Homabay	18774158	18774263	5	U6	U6 spliceosomal RNA [Source:RFAM;Acc:RF00026]
Homabay	18686808	18686989	5	uc_338	TUC338 [Source:RFAM;Acc:RF02271]
Homabay	37193632	37432889	6	ITFG1	integrin alpha FG-GAP repeat containing 1 [Source:HGNC Symbol;Acc:HGNC:30697]
Homabay	36122035	36188003	6	N4BP1	NEDD4 binding protein 1 [Source:HGNC Symbol;Acc:HGNC:29850]
Homabay	37443384	37504287	6	NETO2	neuropilin and tolloid like 2 [Source:HGNC Symbol;Acc:HGNC:14644]
Homabay	37387941	37388040	6	U6	U6 spliceosomal RNA [Source:RFAM;Acc:RF00026]
Homabay	110513672	110705002	7	EML5	echinoderm microtubule associated protein like 5 [Source:HGNC Symbol;Acc:HGNC:18197]
Homabay	110463461	110513300	7	ZC3H14	zinc finger CCCH-type containing 14 [Source:HGNC Symbol;Acc:HGNC:20509]
Homabay	19932466	20166754	8	RBPJ	recombination signal binding protein for immunoglobulin kappa J region [Source:HGNC Symbol;Acc:HGNC:5724]
Homabay	135115078	135450811	9	ABCA13	ATP binding cassette subfamily A member 13 [Source:HGNC Symbol;Acc:HGNC:14638]
Homabay	135133427	135133533	9	U6	U6 spliceosomal RNA [Source:RFAM;Acc:RF00026]
Homabay	32494290	32994840	11	DIAPH3	diaphanous related formin 3 [Source:HGNC Symbol;Acc:HGNC:15480]
Homabay	22298498	22651675	13	ITGA9	integrin subunit alpha 9 [Source:HGNC Symbol;Acc:HGNC:6145]
Homabay	130079132	130332716	15	PID1	PTB-containing, cubilin and LRP1-interacting protein [Source:RefSeq peptide;Acc:NP_001166991]
Homabay	57867823	57867928	16	U6	U6 spliceosomal RNA [Source:RFAM;Acc:RF00026]
Homabay	50353929	50550250	17	PREX1	phosphatidylinositol-3,4,5-trisphosphate dependent Rac exchange factor 1 [Source:HGNC Symbol;Acc:HGNC:32594]
Busia	200667544	200667694	1	CDKN2B-AS	CDKN2B antisense RNA 1 intronic convserved region [Source:RFAM;Acc:RF01909]
Busia	42452778	43068323	2	SOX6	SRY-box 6 [Source:HGNC Symbol;Acc:HGNC:16421]
Busia	89957682	90263803	2	SSBP2	single stranded DNA binding protein 2 [Source:HGNC Symbol;Acc:HGNC:15831]
Busia	123202753	123331144	4	ABCA4	ATP binding cassette subfamily A member 4 [Source:HGNC Symbol;Acc:HGNC:34]
Busia	123371193	123390129	4	GCLM	glutamate-cysteine ligase modifier subunit [Source:HGNC Symbol;Acc:HGNC:4312]
Busia	42136153	42136273	4	SNORA26	Small nucleolar RNA SNORA26 [Source:RFAM;Acc:RF00568]
Busia	42162338	42237427	4	VIRMA	vir like m6A methyltransferase associated [Source:HGNC Symbol;Acc:HGNC:24500]
Busia	18642823	18648848	5	AMHR2	Sus scrofa anti-Mullerian hormone receptor type 2 (AMHR2), mRNA. [Source:RefSeq mRNA;Acc:NM_001205327]
Busia	91678608	91713925	5	DCN	Sus scrofa decorin (DCN), mRNA. [Source:RefSeq mRNA;Acc:NM_213920]
Busia	63061994	63087701	5	FOXJ2	forkhead box J2 [Source:HGNC Symbol;Acc:HGNC:24818]
Busia	91796324	91801357	5	KERA	keratocan [Source:HGNC Symbol;Acc:HGNC:6309]
Busia	91748494	91760563	5	LUM	lumican precursor [Source:RefSeq peptide;Acc:NP_001230268]
Busia	18696607	18717199	5	MAP3K12	mitogen-activated protein kinase kinase kinase 12 [Source:HGNC Symbol;Acc:HGNC:6851]
Busia	63121972	63135549	5	NECAP1	NECAP endocytosis associated 1 [Source:HGNC Symbol;Acc:HGNC:24539]
Busia	18724164	18724826	5	NPFF	neuropeptide FF-amide peptide precursor [Source:HGNC Symbol;Acc:HGNC:7901]
Busia	18588941	18630760	5	SP1	Sp1 transcription factor [Source:HGNC Symbol;Acc:HGNC:11205]
Busia	18718158	18723839	5	TARBP2	TARBP2, RISC loading complex RNA binding subunit [Source:HGNC Symbol;Acc:HGNC:11569]
Busia	18678623	18678725	5	U6	U6 spliceosomal RNA [Source:RFAM;Acc:RF00026]
Busia	18774158	18774263	5	U6	U6 spliceosomal RNA [Source:RFAM;Acc:RF00026]
Busia	18686808	18686989	5	uc_338	TUC338 [Source:RFAM;Acc:RF02271]
Busia	70658685	70660145	7	FOXG1	forkhead box G1 [Source:HGNC Symbol;Acc:HGNC:3811]
Busia	70762126	70762232	7	U6	U6 spliceosomal RNA [Source:RFAM;Acc:RF00026]
Busia	41402322	41492977	8	KIT	mast/stem cell growth factor receptor Kit precursor [Source:RefSeq peptide;Acc:NP_001037990]
Busia	48434915	48653667	9	SORL1	sortilin related receptor 1 [Source:HGNC Symbol;Acc:HGNC:11185]
Busia	33227510	33241665	10	BAG1	BAG family molecular chaperone regulator 1 [Source:RefSeq peptide;Acc:NP_001231720]
Busia	33212767	33227911	10	CHMP5	charged multivesicular body protein 5 [Source:RefSeq peptide;Acc:NP_001231673]
Busia	33126675	33200651	10	NFX1	nuclear transcription factor, X-box binding 1 [Source:HGNC Symbol;Acc:HGNC:7803]
Busia	33246247	33255688	10	SPINK4	serine protease inhibitor Kazal-type 4 precursor [Source:RefSeq peptide;Acc:NP_999029]
Busia	33098676	33116154	10		aquaporin-7 [Source:RefSeq peptide;Acc:NP_001106909]
Busia	146411280	146468318	13	SPICE1	spindle and centriole associated protein 1 [Source:HGNC Symbol;Acc:HGNC:25083]
Busia	88005590	88121096	14	FAM35A	family with sequence similarity 35 member A [Source:HGNC Symbol;Acc:HGNC:28773]
Busia	121547669	121553595	15	CHPF	chondroitin polymerizing factor [Source:HGNC Symbol;Acc:HGNC:24291]
Busia	121582044	121586845	15	INHA	Inhibin alpha chain [Source:UniProtKB/Swiss-Prot;Acc:P04087]
Busia	121557240	121581710	15	OBSL1	obscurin like 1 [Source:HGNC Symbol;Acc:HGNC:29092]
Busia	121630316	121643296	15	SLC4A3	solute carrier family 4 member 3 [Source:HGNC Symbol;Acc:HGNC:11029]
Busia	121604132	121619069	15	STK11IP	serine/threonine kinase 11 interacting protein [Source:HGNC Symbol;Acc:HGNC:19184]
Busia	121553694	121562268	15	TMEM198	transmembrane protein 198 [Source:HGNC Symbol;Acc:HGNC:33704]
Busia	35232036	35331465	16	ANKRD55	ankyrin repeat domain 55 [Source:HGNC Symbol;Acc:HGNC:25681]
Busia	75217219	75260149	16	PAPD7	poly(A) RNA polymerase D7, non-canonical [Source:HGNC Symbol;Acc:HGNC:16705]
Busia	40656660	40739172	18	AVL9	AVL9 cell migration associated [Source:HGNC Symbol;Acc:HGNC:28994]
Busia	16052623	16329393	18	CHCHD3	Sus scrofa coiled-coil-helix-coiled-coil-helix domain containing 3 (CHCHD3), mRNA. [Source:RefSeq mRNA;Acc:NM_001244176]
Busia	15109324	15906714	18	EXOC4	exocyst complex component 4 [Source:HGNC Symbol;Acc:HGNC:30389]
Warthog	265261797	265278478	1	ADGRD2	adhesion G protein-coupled receptor D2 [Source:HGNC Symbol;Acc:HGNC:18651]
Warthog	264900591	264921219	1	LHX2	LIM/homeobox protein Lhx2 [Source:RefSeq peptide;Acc:NP_001163990]
Warthog	265078396	265170979	1	NEK6	Serine/threonine-protein kinase Nek6 [Source:UniProtKB/Swiss-Prot;Acc:A2BD05]
Warthog	265284493	265308179	1	NR5A1	Steroidogenic factor 1 [Source:UniProtKB/Swiss-Prot;Acc:P79387]
Warthog	265322049	265570921	1	NR6A1	nuclear receptor subfamily 6 group A member 1 [Source:RefSeq peptide;Acc:NP_001090968]
Warthog	265172237	265235480	1	PSMB7	Proteasome subunit beta type-7 [Source:UniProtKB/Swiss-Prot;Acc:A1XQU1]
Warthog	148905626	148985823	1	TSHZ1	teashirt zinc finger homeobox 1 [Source:HGNC Symbol;Acc:HGNC:10669]
Warthog	148987478	148997954	1	ZADH2	zinc binding alcohol dehydrogenase domain containing 2 [Source:HGNC Symbol;Acc:HGNC:28697]
Warthog	147984106	148100784	1	ZNF516	zinc finger protein 516 [Source:HGNC Symbol;Acc:HGNC:28990]
Warthog	10086777	10115076	2	CPSF7	cleavage and polyadenylation specific factor 7 [Source:HGNC Symbol;Acc:HGNC:30098]
Warthog	10142196	10156998	2	CYB561A3	cytochrome b561 family member A3 [Source:HGNC Symbol;Acc:HGNC:23014]
Warthog	9800577	9863968	2	DAGLA	diacylglycerol lipase alpha [Source:HGNC Symbol;Acc:HGNC:1165]
Warthog	10171698	10200920	2	DDB1	damage specific DNA binding protein 1 [Source:HGNC Symbol;Acc:HGNC:2717]
Warthog	9735273	9750506	2	FADS1	fatty acid desaturase 1 [Source:RefSeq peptide;Acc:NP_001106512]
Warthog	9632454	9667044	2	FADS2	fatty acid desaturase 2 [Source:RefSeq peptide;Acc:NP_001165221]
Warthog	9752751	9753893	2	FEN1	flap structure-specific endonuclease 1 [Source:HGNC Symbol;Acc:HGNC:3650]
Warthog	10017344	10018240	2	LRRC10B	leucine rich repeat containing 10B [Source:HGNC Symbol;Acc:HGNC:37215]
Warthog	9761233	9795841	2	MYRF	myelin regulatory factor [Source:HGNC Symbol;Acc:HGNC:1181]
Warthog	37809497	38755258	2	NELL1	neural EGFL like 1 [Source:HGNC Symbol;Acc:HGNC:7750]
Warthog	10242168	10253004	2	PGA5	Pepsin A [Source:UniProtKB/Swiss-Prot;Acc:P00791]
Warthog	10038057	10046324	2	PPP1R32	protein phosphatase 1 regulatory subunit 32 [Source:HGNC Symbol;Acc:HGNC:28869]
Warthog	38767216	38827021	2	SLC6A5	solute carrier family 6 member 5 [Source:HGNC Symbol;Acc:HGNC:11051]
Warthog	9947737	10012517	2	SYT7	synaptotagmin 7 [Source:HGNC Symbol;Acc:HGNC:11514]
Warthog	10158188	10171457	2	TKFC	Triokinase/FMN cyclase ATP-dependent dihydroxyacetone kinase FAD-AMP lyase (cyclizing) [Source:UniProtKB/Swiss-Prot;Acc:F1RKQ4]
Warthog	10134986	10143049	2	TMEM138	transmembrane protein 138 [Source:HGNC Symbol;Acc:HGNC:26944]
Warthog	10112730	10122019	2	TMEM216	transmembrane protein 216 [Source:HGNC Symbol;Acc:HGNC:25018]
Warthog	10206005	10239763	2	VWCE	von Willebrand factor C and EGF domains [Source:HGNC Symbol;Acc:HGNC:26487]
Warthog	29366819	29413697	6	AMFR	autocrine motility factor receptor [Source:HGNC Symbol;Acc:HGNC:463]
Warthog	28802651	28814413	6	ESRP2	epithelial splicing regulatory protein 2 [Source:HGNC Symbol;Acc:HGNC:26152]
Warthog	28666453	28828018	6	NFATC3	nuclear factor of activated T-cells 3 [Source:HGNC Symbol;Acc:HGNC:7777]
Warthog	29339841	29363300	6	NUDT21	cleavage and polyadenylation specificity factor subunit 5 [Source:RefSeq peptide;Acc:NP_001231176]
Warthog	29312749	29340182	6	OGFOD1	prolyl 3-hydroxylase OGFOD1 [Source:RefSeq peptide;Acc:NP_001231248]
Warthog	28883587	28945912	6	PRMT7	protein arginine methyltransferase 7 [Source:HGNC Symbol;Acc:HGNC:25557]
Warthog	28820743	28876158	6	SLC7A6	solute carrier family 7 member 6 [Source:HGNC Symbol;Acc:HGNC:11064]
Warthog	28871463	28884141	6	SLC7A6OS	solute carrier family 7 member 6 opposite strand [Source:HGNC Symbol;Acc:HGNC:25807]
Warthog	28936467	29025391	6	SMPD3	sphingomyelin phosphodiesterase 3 [Source:HGNC Symbol;Acc:HGNC:14240]
Warthog	64336349	64445666	9	ATP2B4	ATPase plasma membrane Ca2+ transporting 4 [Source:HGNC Symbol;Acc:HGNC:817]
Warthog	64031841	64038694	9	BTG2	protein BTG2 [Source:RefSeq peptide;Acc:NP_001090974]
Warthog	63812103	63895080	9	FMO1	Dimethylaniline monooxygenase [N-oxide-forming] 1 [Source:UniProtKB/Swiss-Prot;Acc:P16549]
Warthog	63812103	63852081	9	FMO2	flavin containing monooxygenase 2 [Source:HGNC Symbol;Acc:HGNC:3770]
Warthog	63908868	63934982	9	FMO4	flavin containing monooxygenase 4 [Source:HGNC Symbol;Acc:HGNC:3772]
Warthog	64059853	64074106	9	FMOD	fibromodulin [Source:HGNC Symbol;Acc:HGNC:3774]
Warthog	64211477	64220981	9	OPTC	Sus scrofa opticin (OPTC), mRNA. [Source:RefSeq mRNA;Acc:NM_214008]
Warthog	64190982	64207001	9	PRELP	proline and arginine rich end leucine rich repeat protein [Source:HGNC Symbol;Acc:HGNC:9357]
Warthog	28509261	28510310	10	GAS1	growth arrest specific 1 [Source:HGNC Symbol;Acc:HGNC:4165]
Warthog	29250404	29297695	14	ATP6V0A2	ATPase H+ transporting V0 subunit a2 [Source:HGNC Symbol;Acc:HGNC:18481]
Warthog	29068409	29096550	14	CCDC92	coiled-coil domain containing 92 [Source:HGNC Symbol;Acc:HGNC:29563]
Warthog	29369078	29400434	14	DDX55	DEAD-box helicase 55 [Source:HGNC Symbol;Acc:HGNC:20085]
Warthog	29095722	29249638	14	DNAH10	dynein axonemal heavy chain 10 [Source:HGNC Symbol;Acc:HGNC:2941]
Warthog	29335582	29355435	14	GTF2H3	general transcription factor IIH subunit 3 [Source:HGNC Symbol;Acc:HGNC:4657]
Warthog	29520015	29543852	14	KMT5A	lysine methyltransferase 5A [Source:HGNC Symbol;Acc:HGNC:29489]
Warthog	28663512	28818417	14	NCOR2	nuclear receptor corepressor 2 [Source:RefSeq peptide;Acc:NP_001038041]
Warthog	28824828	28840487	14	RFLNA	refilin A [Source:HGNC Symbol;Acc:HGNC:27051]
Warthog	29424148	29470674	14	RILPL1	Rab interacting lysosomal protein like 1 [Source:HGNC Symbol;Acc:HGNC:26814]
Warthog	29477281	29522762	14	RILPL2	Rab interacting lysosomal protein like 2 [Source:HGNC Symbol;Acc:HGNC:28787]
Warthog	29559155	29620696	14	SBNO1	strawberry notch homolog 1 [Source:HGNC Symbol;Acc:HGNC:22973]
Warthog	29457372	29477097	14	SNRNP35	small nuclear ribonucleoprotein U11/U12 subunit 35 [Source:HGNC Symbol;Acc:HGNC:30852]
Warthog	29297882	29332720	14	TCTN2	tectonic family member 2 [Source:HGNC Symbol;Acc:HGNC:25774]
Warthog	28983001	28983107	14	U6	U6 spliceosomal RNA [Source:RFAM;Acc:RF00026]
Warthog	29031605	29068870	14	ZNF664	zinc finger protein 664 [Source:HGNC Symbol;Acc:HGNC:25406]
Bush pigs	34692715	35258701	1	PTPRK	protein tyrosine phosphatase, receptor type K [Source:HGNC Symbol;Acc:HGNC:9674]
Bush pigs	35333473	35521353	1	THEMIS	thymocyte selection associated [Source:HGNC Symbol;Acc:HGNC:21569]
Bush pigs	38573881	38574061	6	7SK	7SK RNA [Source:RFAM;Acc:RF00100]
Bush pigs	38435729	38436076	6	RPLP2	ribosomal protein lateral stalk subunit P2 [Source:HGNC Symbol;Acc:HGNC:10377]
Bush pigs	33732003	33750098	6	SALL1	spalt like transcription factor 1 [Source:HGNC Symbol;Acc:HGNC:10524]
Bush pigs	38453443	38453547	6	U6	U6 spliceosomal RNA [Source:RFAM;Acc:RF00026]
Bush pigs	38912418	38912524	6	U6	U6 spliceosomal RNA [Source:RFAM;Acc:RF00026]
Bush pigs	114619396	114707051	7	BTBD7	BTB domain containing 7 [Source:HGNC Symbol;Acc:HGNC:18269]
Bush pigs	114345091	114358571	7	CHGA	chromogranin A [Source:HGNC Symbol;Acc:HGNC:1929]
Bush pigs	114210205	114277813	7	GOLGA5	golgin A5 [Source:HGNC Symbol;Acc:HGNC:4428]
Bush pigs	114586306	114590804	7	GON7	Sus scrofa GON7, KEOPS complex subunit homolog (GON7), mRNA. [Source:RefSeq mRNA;Acc:NM_001167590]
Bush pigs	114361968	114520179	7	ITPK1	inositol-tetrakisphosphate 1-kinase [Source:RefSeq peptide;Acc:NP_001137164]
Bush pigs	114175183	114217319	7	LGMN	legumain [Source:HGNC Symbol;Acc:HGNC:9472]
Bush pigs	114035383	114541592	7	RIN3	Ras and Rab interactor 3 [Source:HGNC Symbol;Acc:HGNC:18751]
Bush pigs	114128023	114128086	7	SNORD77	Small nucleolar RNA SNORD77 [Source:RFAM;Acc:RF00591]
Bush pigs	114574139	114575889	7	TMEM251	Transmembrane protein 251 [Source:UniProtKB/Swiss-Prot;Acc:Q6QA74]
Bush pigs	39703362	39709817	8	RASL11B	RAS like family 11 member B [Source:HGNC Symbol;Acc:HGNC:23804]
Bush pigs	39603850	39603971	8	SNORA26	Small nucleolar RNA SNORA26 [Source:RFAM;Acc:RF00568]
Bush pigs	39633377	39633500	8	SNORA26	Small nucleolar RNA SNORA26 [Source:RFAM;Acc:RF00568]
Bush pigs	67648863	67661477	9	C1orf116	chromosome 1 open reading frame 116 [Source:HGNC Symbol;Acc:HGNC:28667]
Bush pigs	67724539	67827509	9	C4BPA	Sus scrofa complement component 4 binding protein, alpha (C4BPA), mRNA. [Source:RefSeq mRNA;Acc:NM_213942]
Bush pigs	67716283	67725782	9	C4BPB	complement component 4 binding protein beta [Source:HGNC Symbol;Acc:HGNC:1328]
Bush pigs	53079550	53178884	9	CDON	cell adhesion associated, oncogene regulated [Source:HGNC Symbol;Acc:HGNC:17104]
Bush pigs	53387776	53437136	9	DCPS	m7GpppX diphosphatase [Source:UniProtKB/Swiss-Prot;Acc:Q8MIZ3]
Bush pigs	53309198	53358404	9	FAM118B	family with sequence similarity 118 member B [Source:HGNC Symbol;Acc:HGNC:26110]
Bush pigs	67585646	67601996	9	FCAMR	Fc fragment of IgA and IgM receptor [Source:HGNC Symbol;Acc:HGNC:24692]
Bush pigs	67531965	67546417	9	FCMR	Fc fragment of IgM receptor [Source:HGNC Symbol;Acc:HGNC:14315]
Bush pigs	53365250	53372954	9	FOXRED1	Sus scrofa FAD dependent oxidoreductase domain containing 1 (FOXRED1), mRNA. [Source:RefSeq mRNA;Acc:NM_001244921]
Bush pigs	67400727	67405378	9	IL10	Sus scrofa interleukin 10 (IL10), mRNA. [Source:RefSeq mRNA;Acc:NM_214041]
Bush pigs	67469350	67479662	9	IL19	interleukin 19 [Source:HGNC Symbol;Acc:HGNC:5990]
Bush pigs	67498813	67501564	9	IL20	interleukin 20 [Source:HGNC Symbol;Acc:HGNC:6002]
Bush pigs	67523188	67530738	9	IL24	interleukin 24 [Source:HGNC Symbol;Acc:HGNC:11346]
Bush pigs	53492198	53664072	9	KIRREL3	kirre like nephrin family adhesion molecule 3 [Source:HGNC Symbol;Acc:HGNC:23204]
Bush pigs	67314484	67363501	9	MAPKAPK2	mitogen-activated protein kinase-activated protein kinase 2 [Source:HGNC Symbol;Acc:HGNC:6887]
Bush pigs	67681987	67707442	9	PFKFB2	6-phosphofructo-2-kinase/fructose-2,6-biphosphatase 2 [Source:HGNC Symbol;Acc:HGNC:8873]
Bush pigs	67552807	67574827	9	PIGR	polymeric immunoglobulin receptor precursor [Source:RefSeq peptide;Acc:NP_999324]
Bush pigs	53301818	53309927	9	RPUSD4	RNA pseudouridylate synthase domain containing 4 [Source:RefSeq peptide;Acc:NP_001231886]
Bush pigs	53354747	53365820	9	SRPRA	SRP receptor alpha subunit [Source:HGNC Symbol;Acc:HGNC:11307]
Bush pigs	53442865	53484269	9	ST3GAL4	CMP-N-acetylneuraminate-beta-galactosamide-alpha-2, 3-sialyltransferase 4 [Source:RefSeq peptide;Acc:NP_998922]
Bush pigs	53375625	53394171	9	TIRAP	TIR domain containing adaptor protein [Source:HGNC Symbol;Acc:HGNC:17192]
Bush pigs	67672647	67682074	9	YOD1	YOD1 deubiquitinase [Source:HGNC Symbol;Acc:HGNC:25035]
Bush pigs	62410928	62411031	10	U6	U6 spliceosomal RNA [Source:RFAM;Acc:RF00026]
Bush pigs	173634661	173910739	13	GBE1	1,4-alpha-glucan branching enzyme 1 [Source:HGNC Symbol;Acc:HGNC:4180]
